# Supplementary material for: A study on interfacial behaviors of epoxy/graphene oxide derived from pitch-based graphite fibers
Source: publisher site journal article supplement (doi:10.1515/ntrev-2021-0111), 2021-01-01
Supplement: Supplementary file 1 [file ntrev-2021-0111_sm.pdf]

# Supplementary material

**Table S1:** Surface free energy, specific of the test wetting liquids used in the work

| Wetting liquid  | $\gamma_L$ (mJ m <sup>-2</sup> ) | $\gamma_L^L$ (mJ m <sup>-2</sup> ) | $\gamma_L^{SP}$ (mJ m <sup>-2</sup> ) |
|-----------------|----------------------------------|------------------------------------|---------------------------------------|
| Distilled water | 72.80                            | 21.80                              | 51.00                                 |
| Diiodomethane   | 50.80                            | 50.42                              | 0.38                                  |
| Ethylene glycol | 47.70                            | 31.00                              | 16.70                                 |

**Table S2:** The contact angles of neat EP and the EP/GO nanocomposites

| Specimen | Contact angle ( $\theta$ ) |               |                 |
|----------|----------------------------|---------------|-----------------|
|          | Distilled water            | Diiodomethane | Ethylene glycol |
| EP       | 75.0 ± 0.4                 | 29.8 ± 0.5    | 49.5 ± 0.8      |
| EP/GO0.2 | 71.5 ± 0.2                 | 28.9 ± 0.4    | 48.5 ± 0.7      |
| EP/GO0.4 | 69.7 ± 0.1                 | 27.1 ± 0.9    | 47.3 ± 0.5      |
| EP/GO0.6 | 69.2 ± 0.1                 | 30.6 ± 1.0    | 36.1 ± 0.7      |
| EP/GO0.8 | 67.8 ± 0.1                 | 24.9 ± 0.3    | 27.6 ± 1.3      |
